# Supplementary material for: Enantioselective Synthesis of Antiepileptic Agent, (−)‐Levetiracetam, through Evans Asymmetric Strategy
Source: Hindawi journal article supplement (doi:10.1155/2013/176512), 2012-10-02

## SUPPORTING INFORMATION

### Enantioselective synthesis of the antiepileptic agent, (-)- Levetiracetam through Evans asymmetric strategy

K. Chandra Babu<sup>a,b</sup>, R. Buchi Reddy<sup>c</sup>, K. Mukkanti<sup>b</sup>, G. Madhusudhan<sup>a,\*</sup>, K. Suresh<sup>a</sup>  
Satish Nigam<sup>a</sup>

<sup>a</sup>Inogent Laboratories Private Limited, A GVK BIO Company, Hyderabad 500 076, India

<sup>b</sup>Centre for Pharmaceutical Sciences, J.N.T. University, Hyderabad 500 072, India

<sup>c</sup>Orchid Chemicals and Pharmaceuticals Ltd, 476/14, R&D Centre, Chennai -600 119, India

#### Supplementary Material

##### Materials and methods

Melting points were determined on Buchi 540 melting point apparatus and are uncorrected. FT-IR spectra were recorded as KBr pellet on Nicolet 380 FT-IR Instrument (Model Thermo Electron Corporation-Spectrum One), <sup>1</sup>H and <sup>13</sup>C NMR (proton decoupled) spectra were recorded on Varian 400MHz spectrometer using DMSO-*d*<sub>6</sub>, CDCl<sub>3</sub> as solvent and tetramethylsilane (TMS) as internal standard. Mass spectra were recorded on Agilent triple quadrupole mass spectrometer equipped with turboion spray interface at 375 °C. All the organic extracts were dried over sodium sulfate after work-up. The dry reactions were carried out under nitrogen atmosphere with magnetic/mechanical stirring. Unless otherwise mentioned all the solvents and reagents used were of LR grade. TLC was performed on precoated silica-gel plates, which were visualized using UV light and sulphuric acid/ethanol (5:95) charring. Flash column-chromatography was carried out on silica gel (230-400 mesh) unless otherwise stated

### <sup>1</sup>H NMR, <sup>13</sup>C NMR, MS, IR Spectra and HPLC

$^1\text{H}$  NMR in ( $\text{CDCl}_3$ ): compound **3**

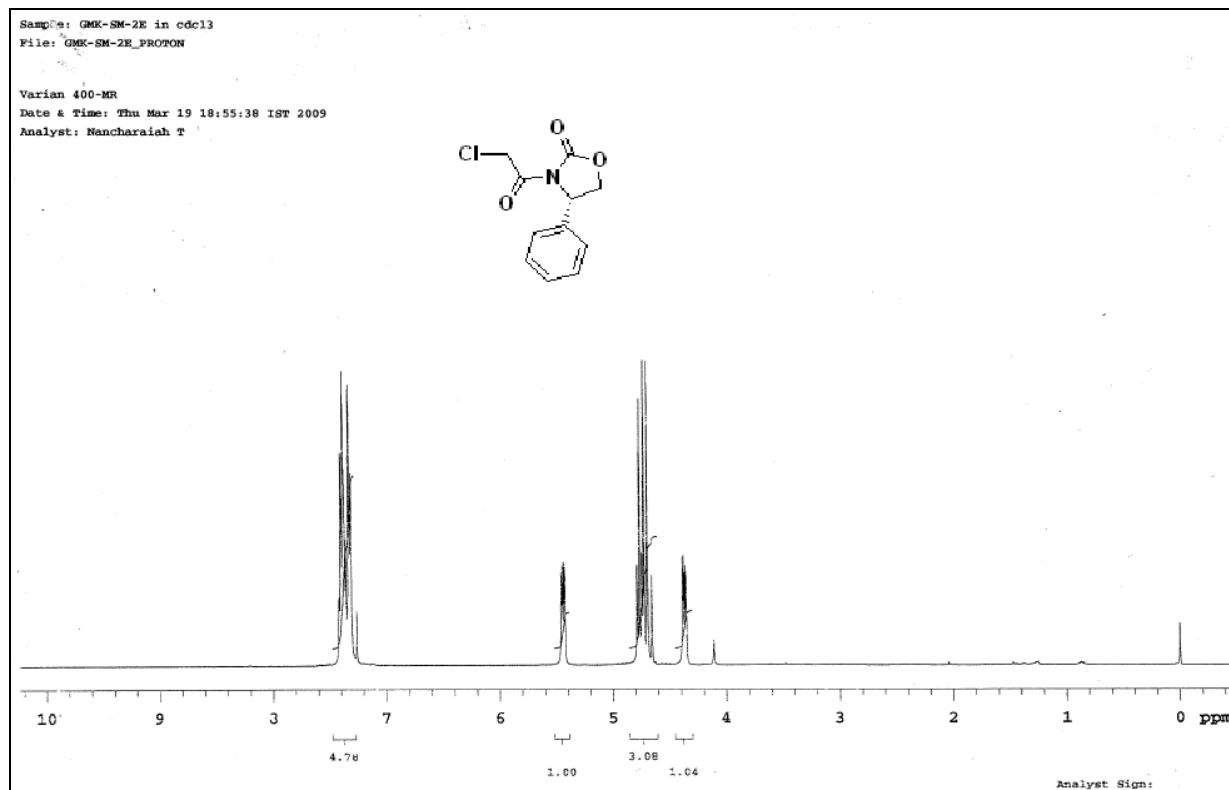

MS (ESI): compound **3**

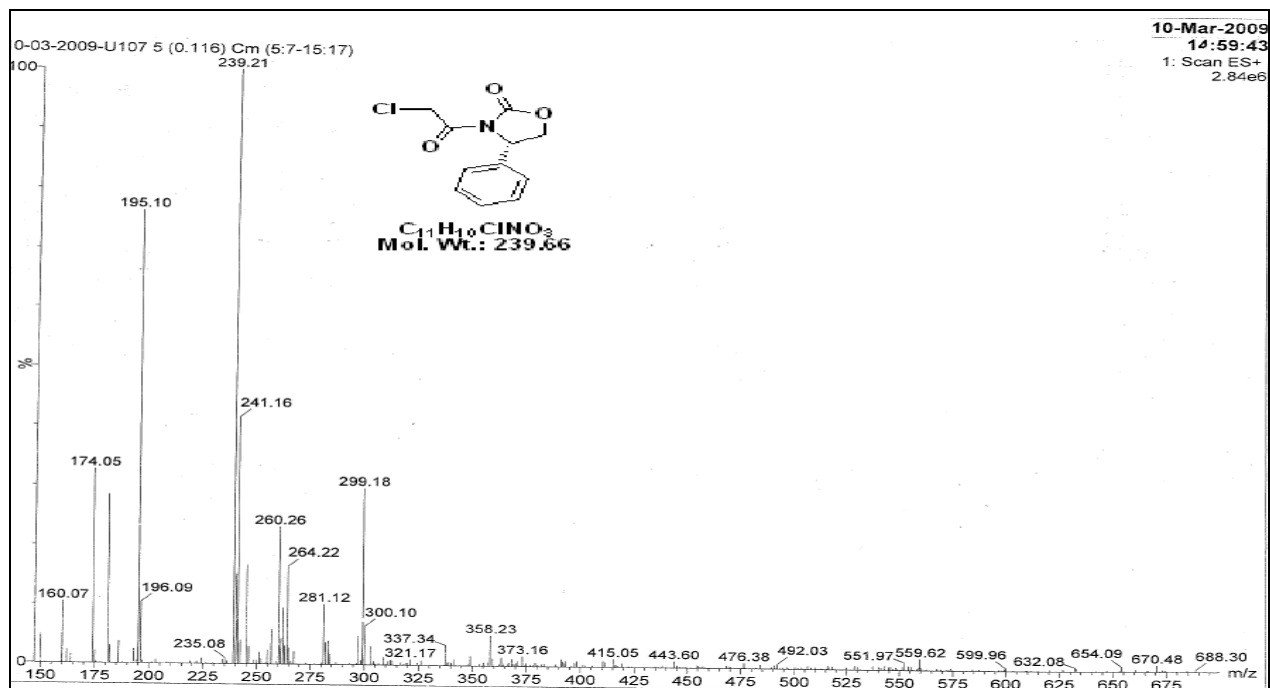

IR (CHCl<sub>3</sub>): compound 3

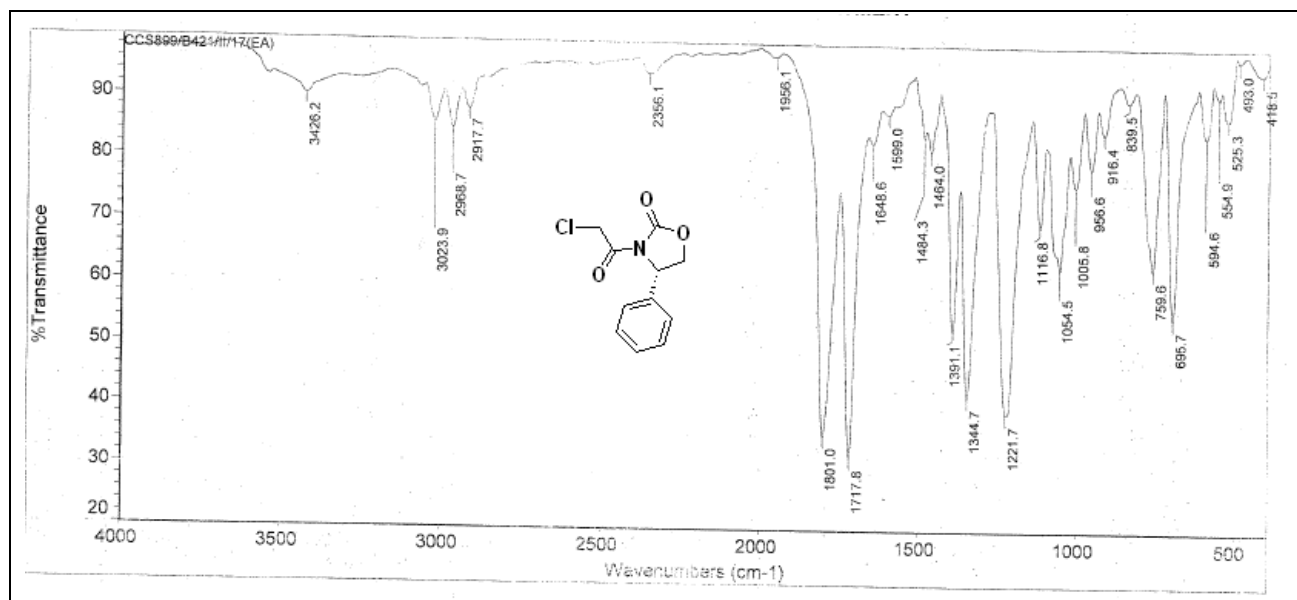

<sup>1</sup>H NMR in (CDCl<sub>3</sub>): compound 4

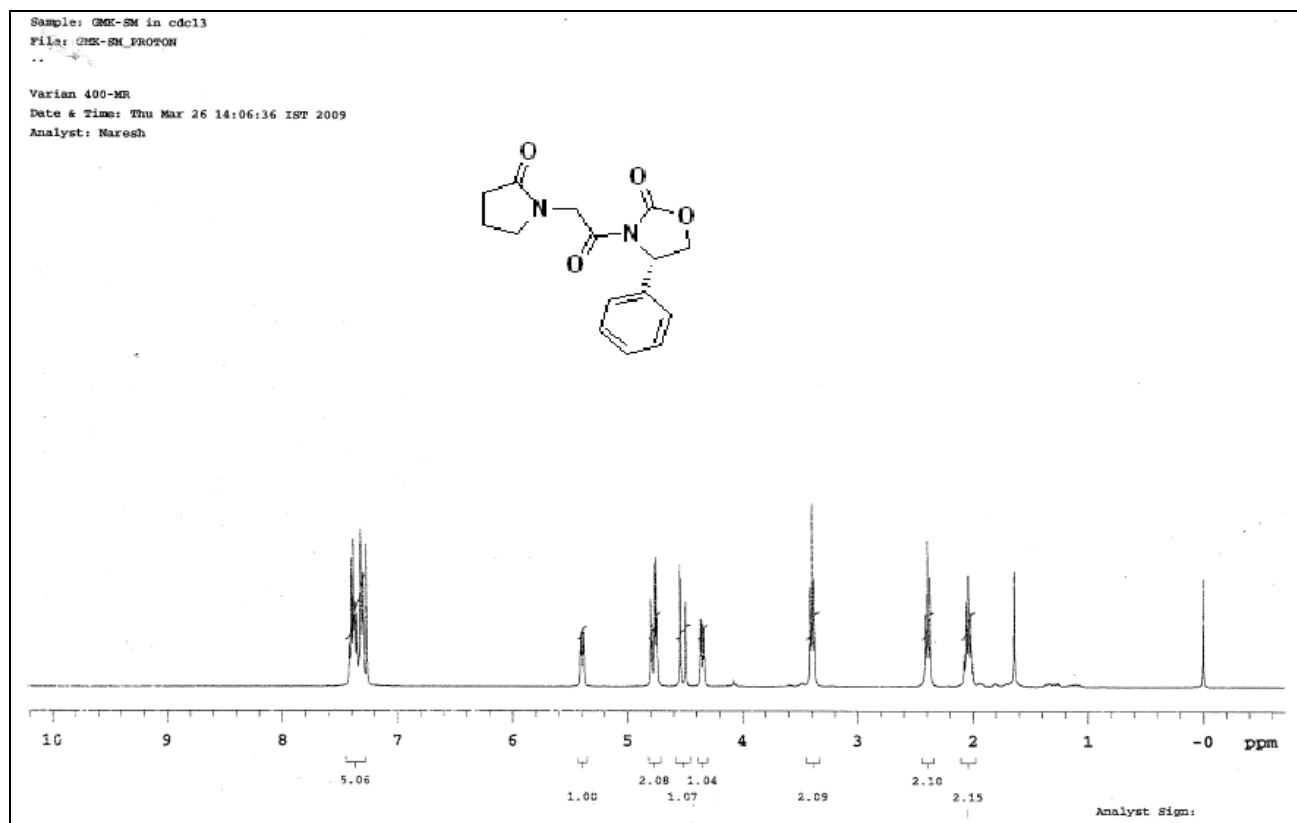

MS (ESI): compound 4

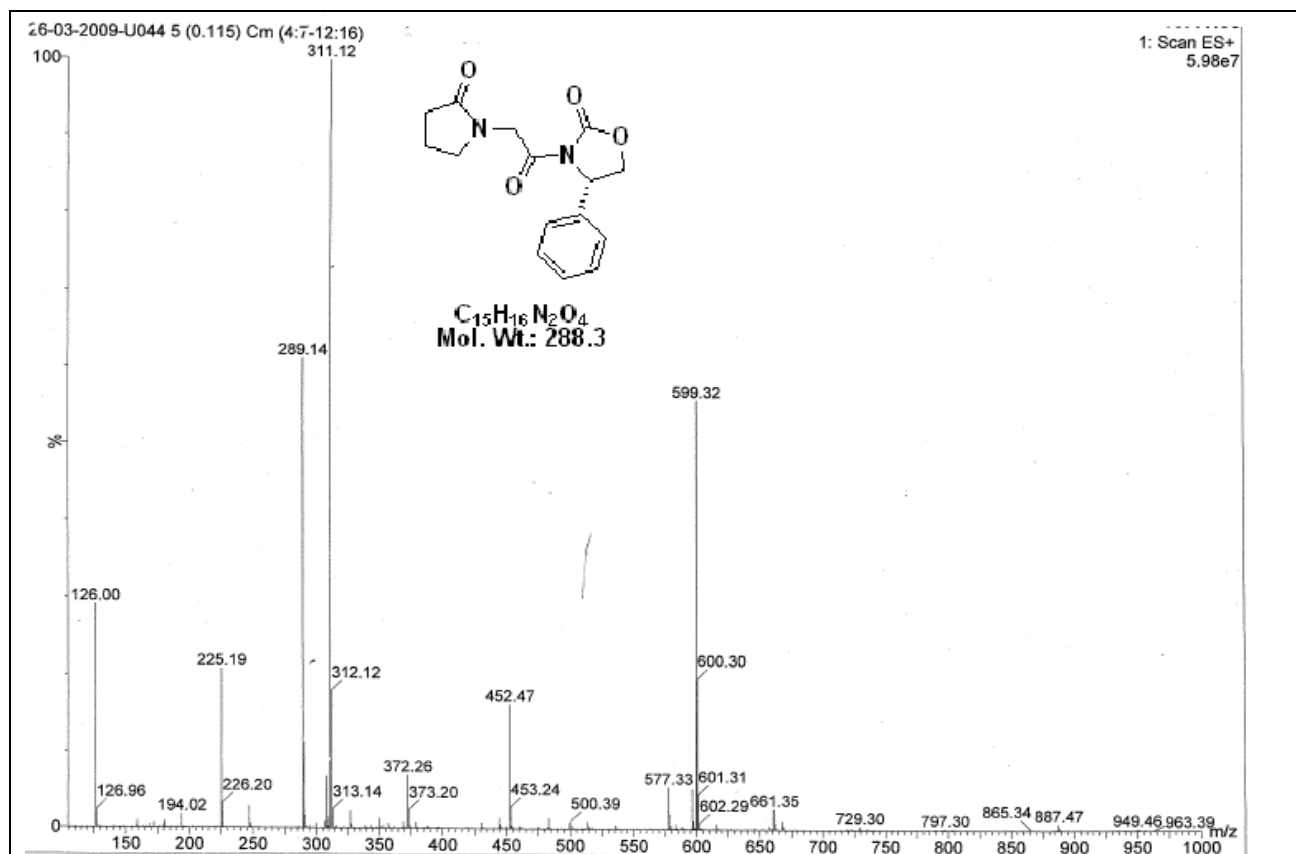

IR in (CHCl<sub>3</sub>): compound 4

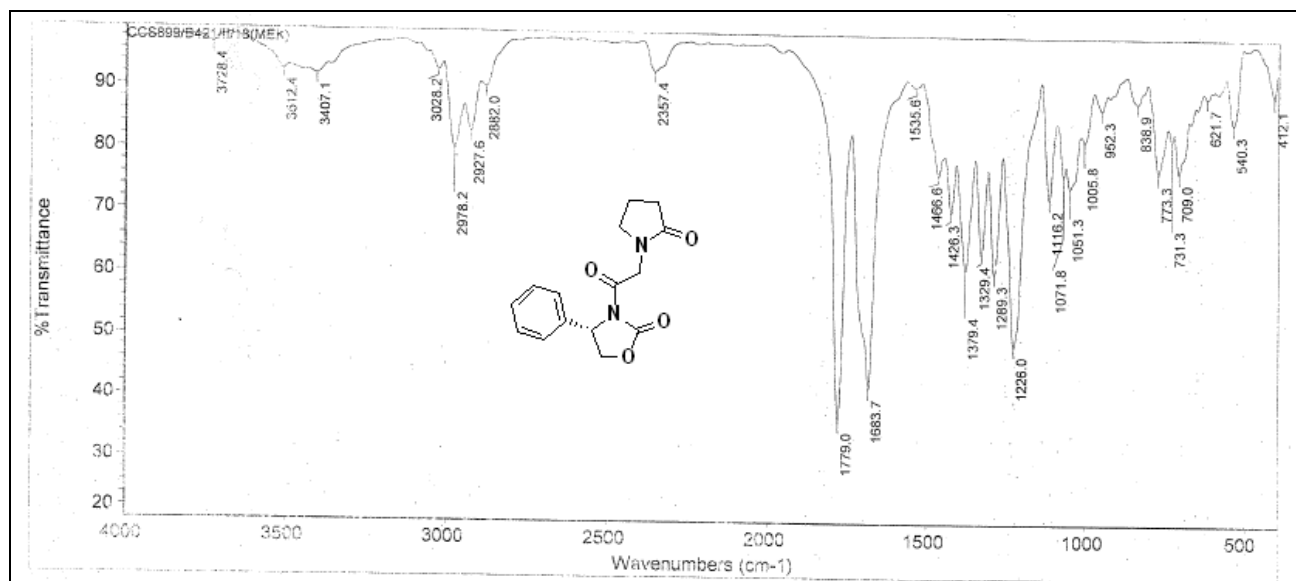

$^1\text{H}$  NMR in ( $\text{CDCl}_3$ ): compound **5**

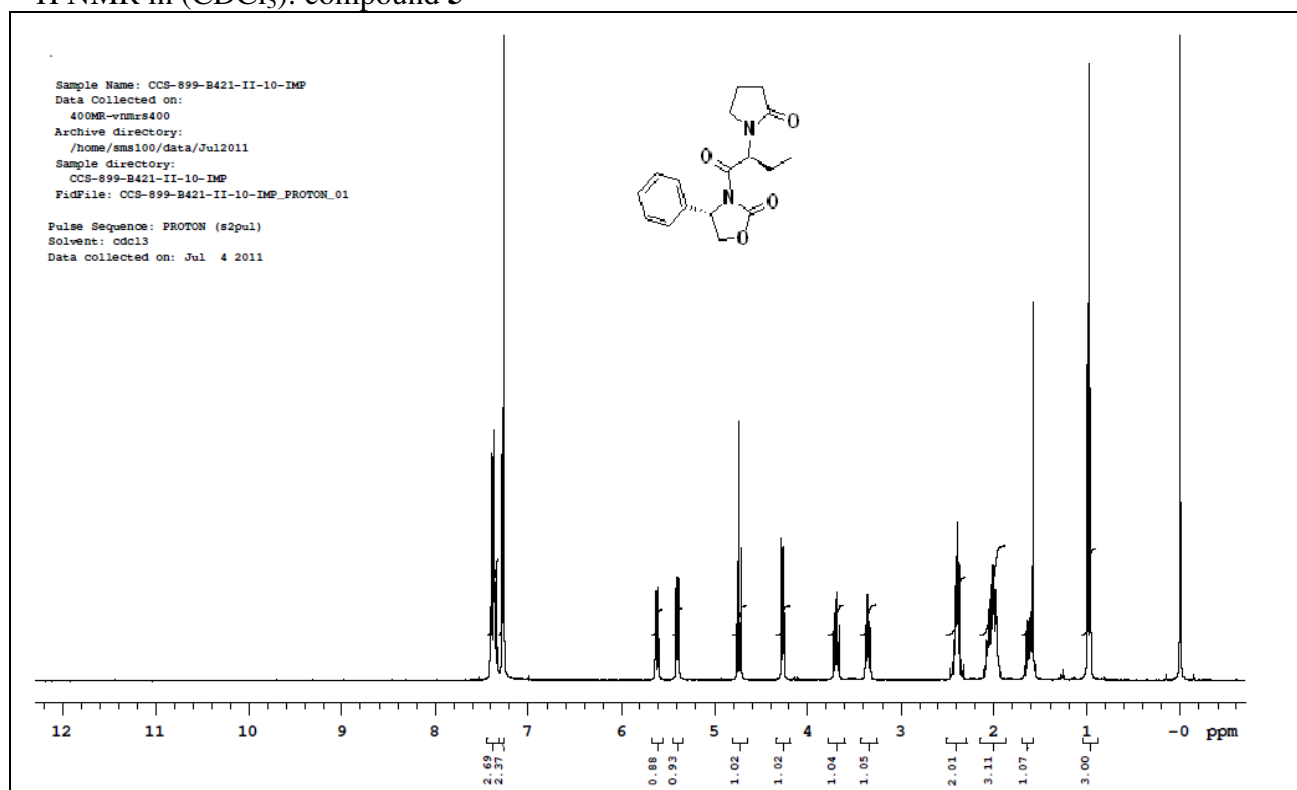

$^{13}\text{C}$  NMR in ( $\text{CDCl}_3$ ): compound **5**

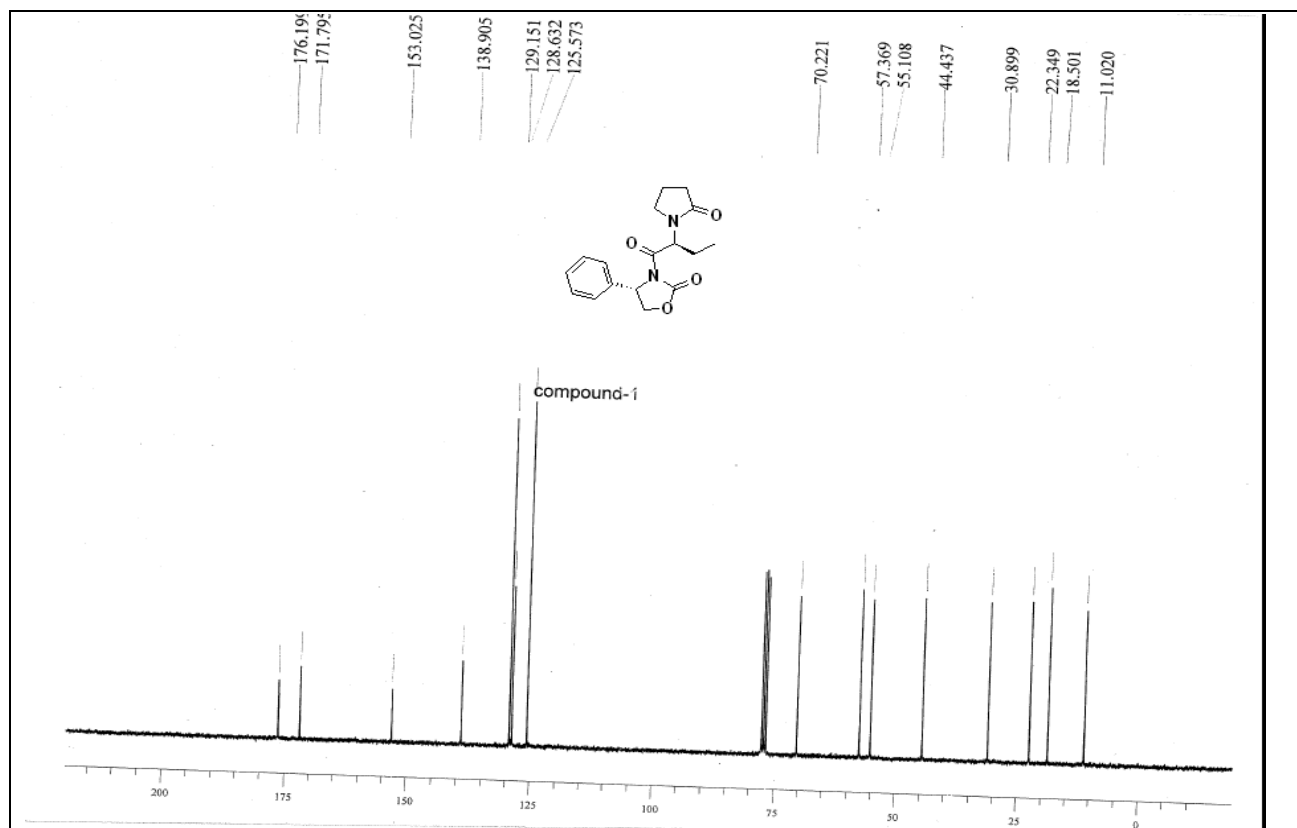

MS (ESI): compound **5**

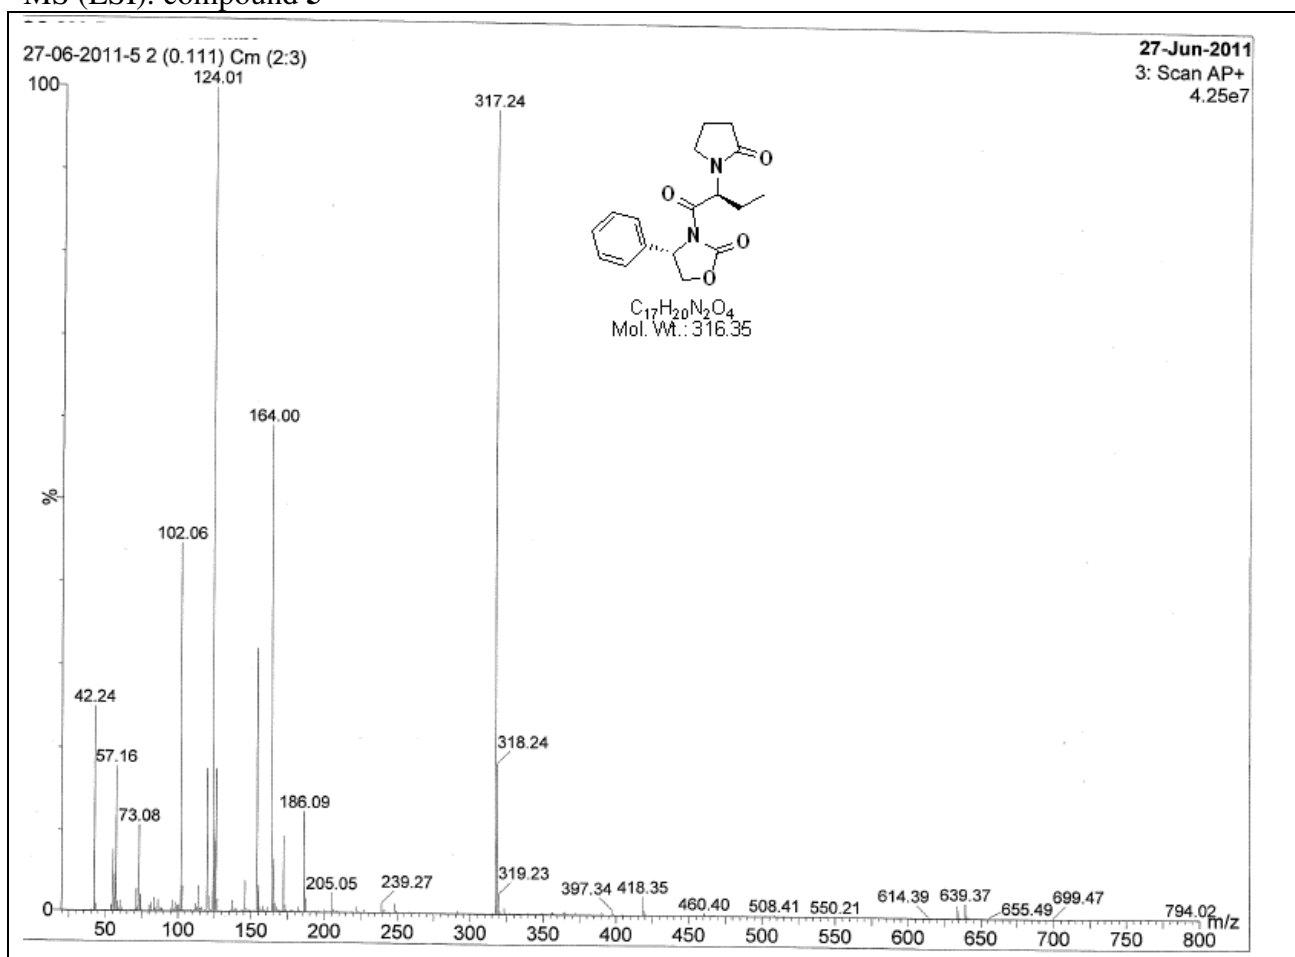

IR (CHCl<sub>3</sub>): compound **5**

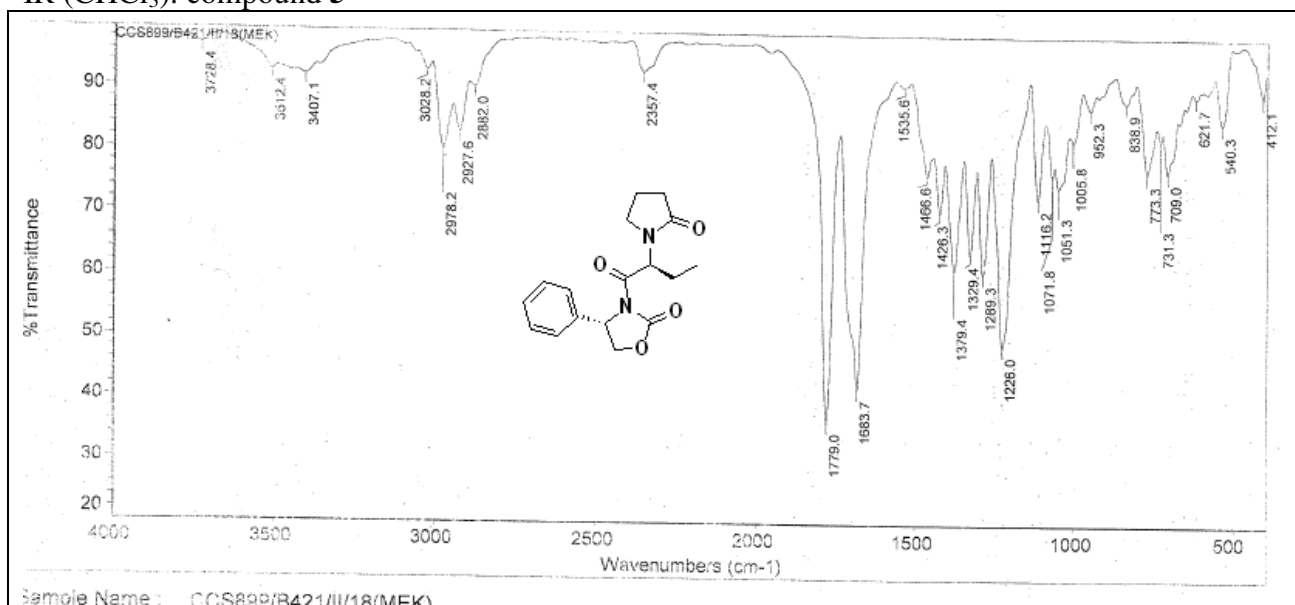

$^1\text{H}$  NMR in ( $\text{CDCl}_3$ ): compound **6**

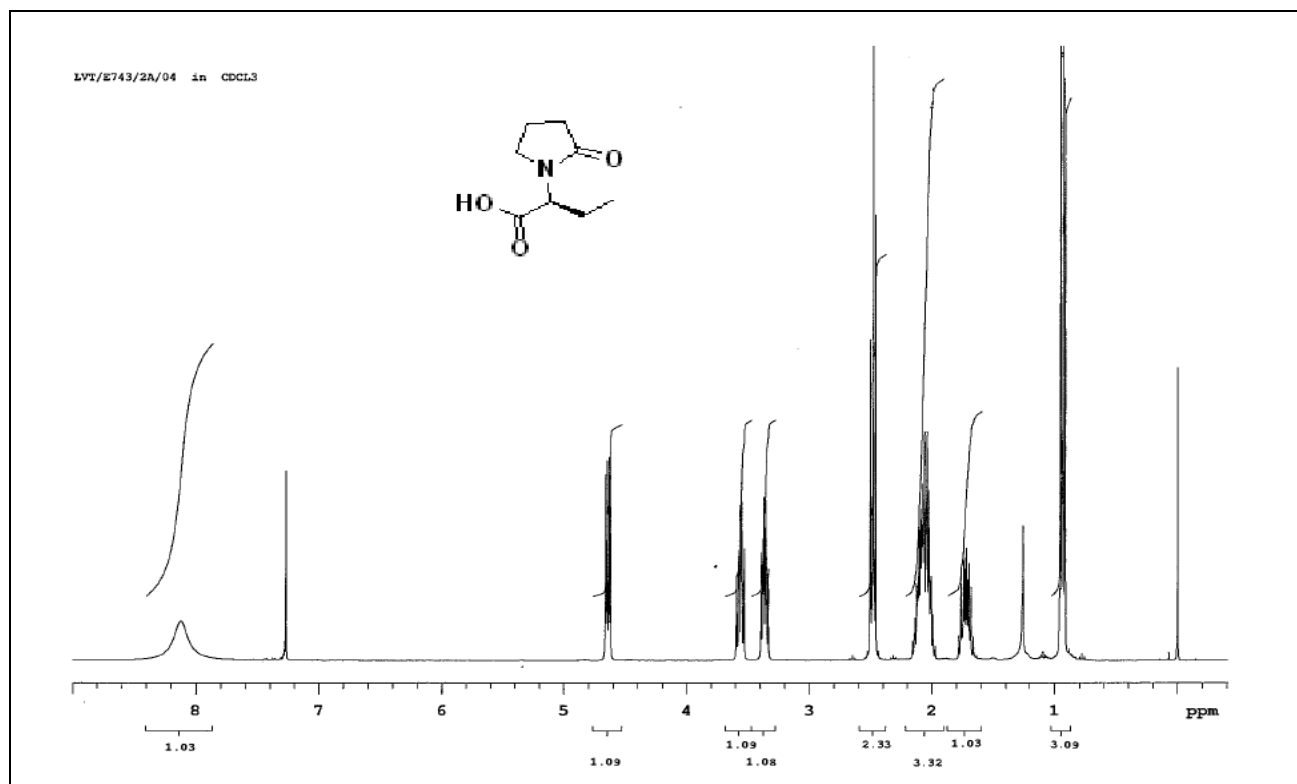

$^{13}\text{C}$  NMR in ( $\text{CDCl}_3$ ): compound **6**

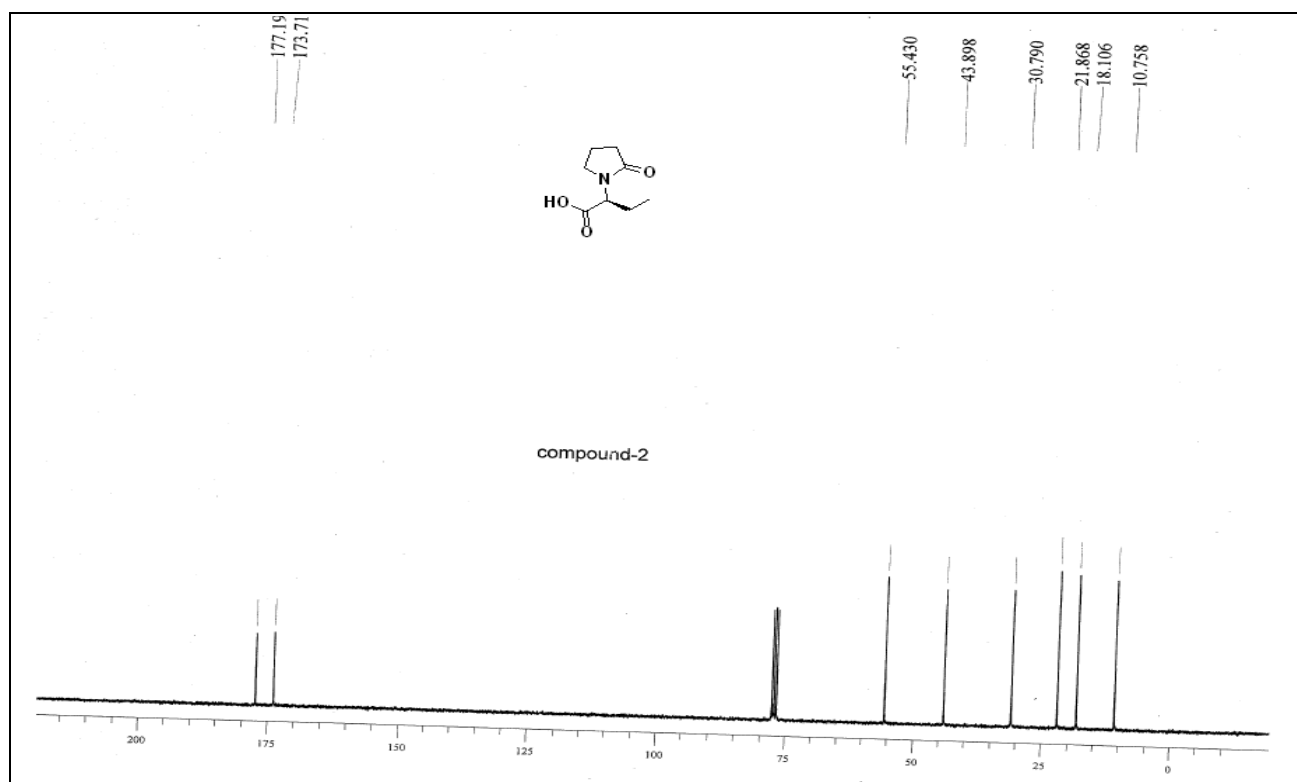

MS(ESI): compound **6**

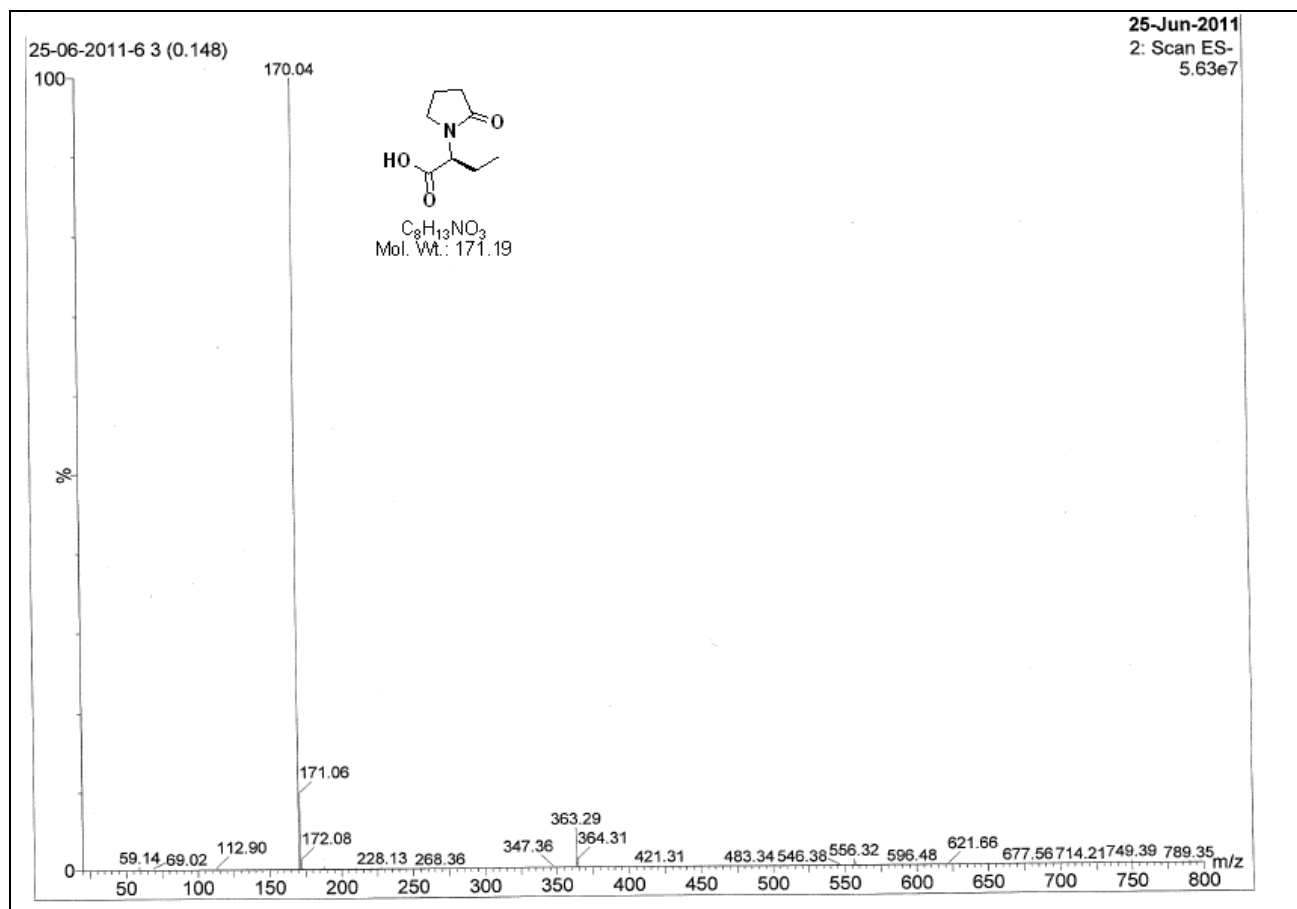

IR in (CHCl<sub>3</sub>): compound **6**

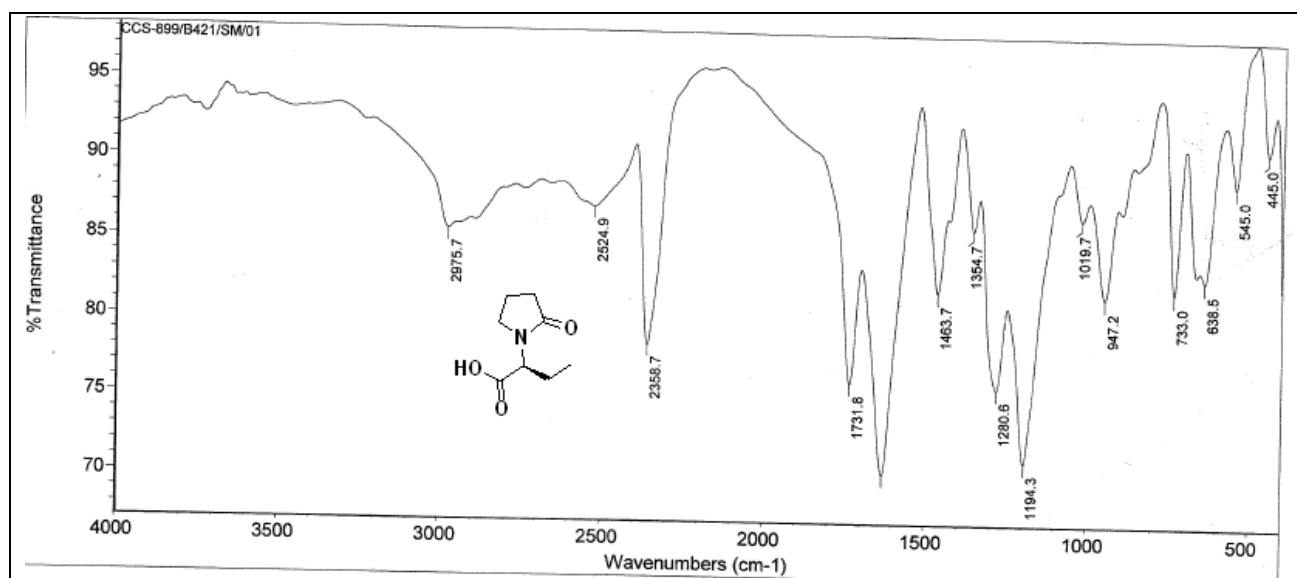



$^1\text{H}$ -NMR in ( $\text{CDCl}_3$ ): compound **1**

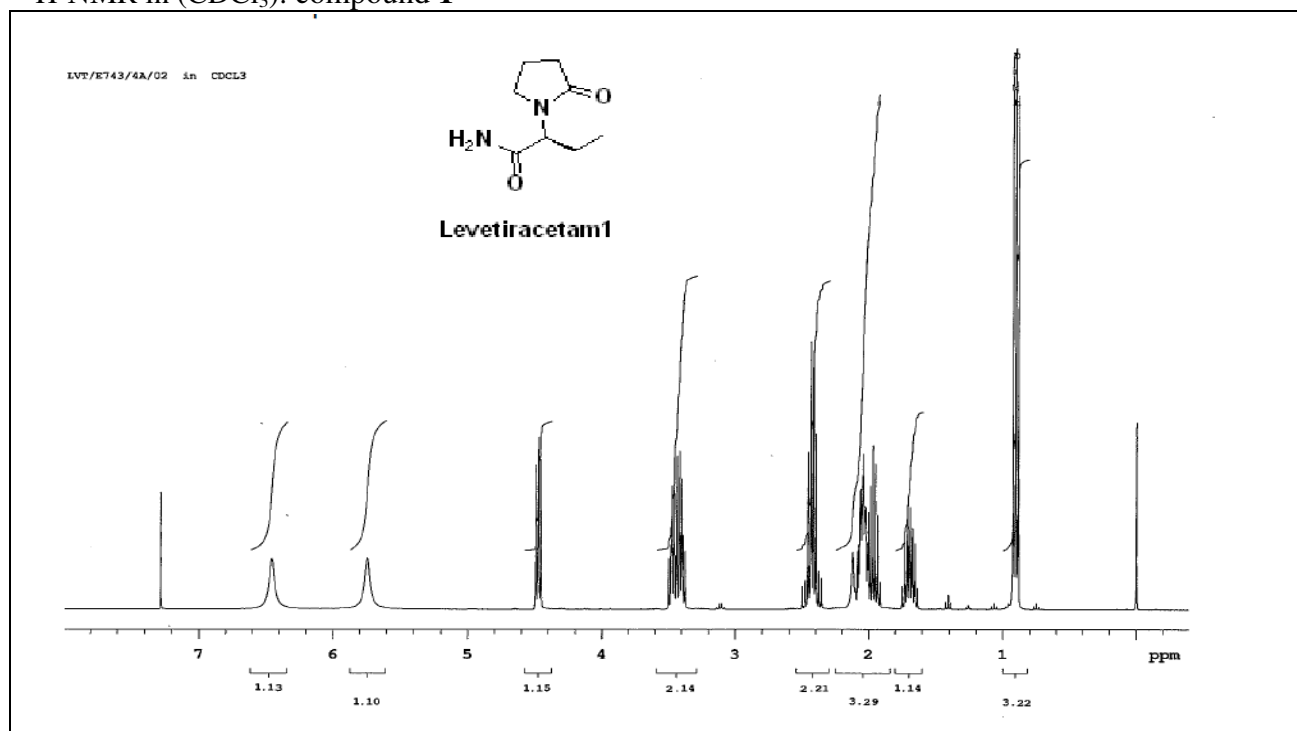

$^{13}\text{C}$  NMR in ( $\text{CHCl}_3$ ): compound **1**

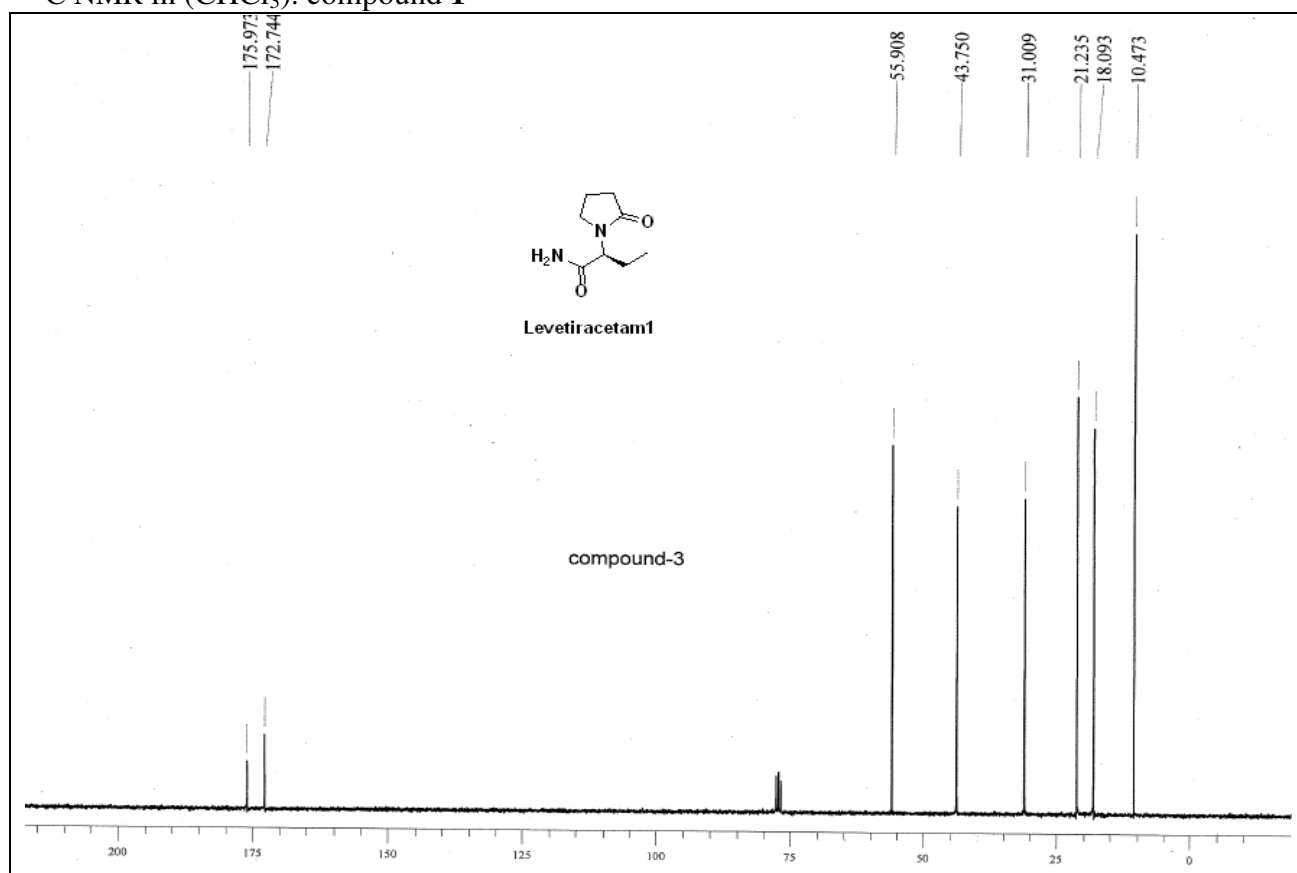

MS (ESI): compound **1**

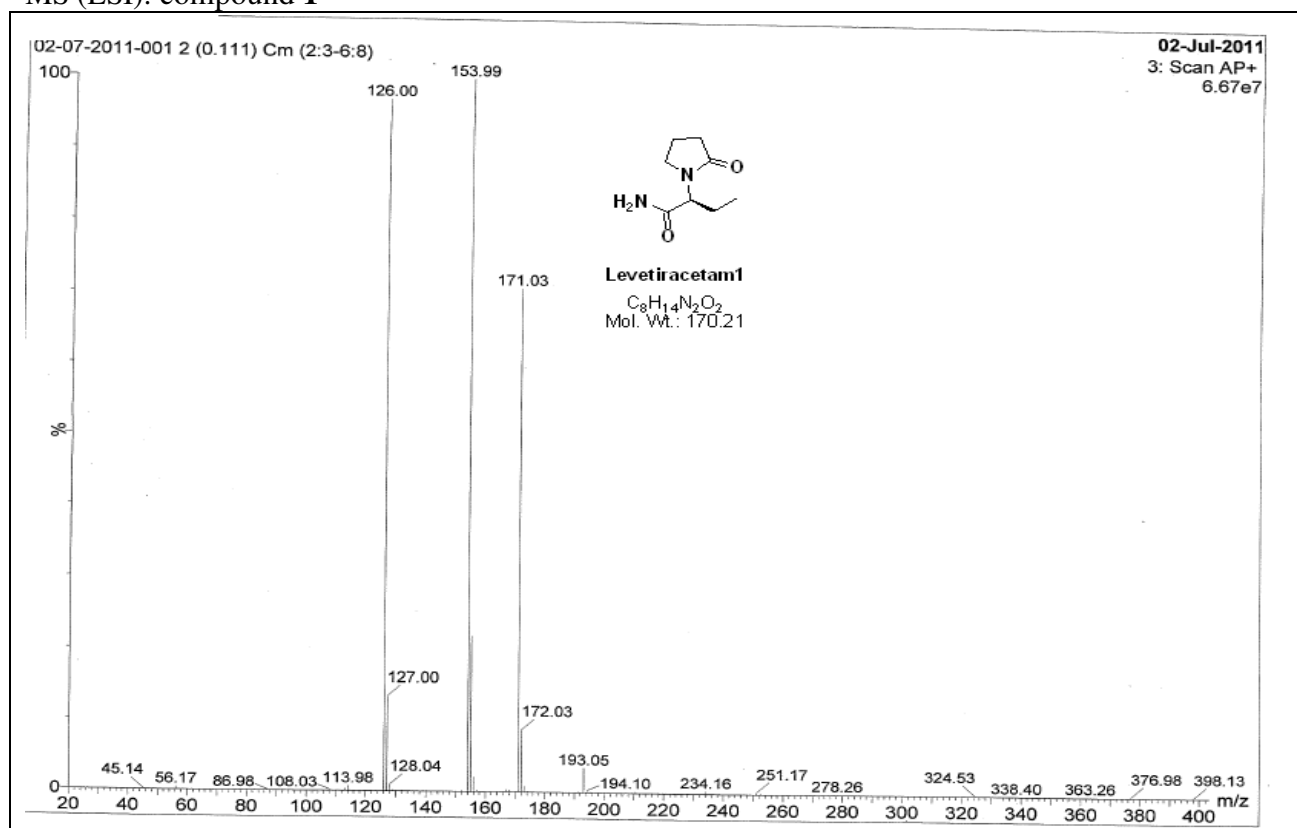

IR in (CHCl<sub>3</sub>) : compound **1**

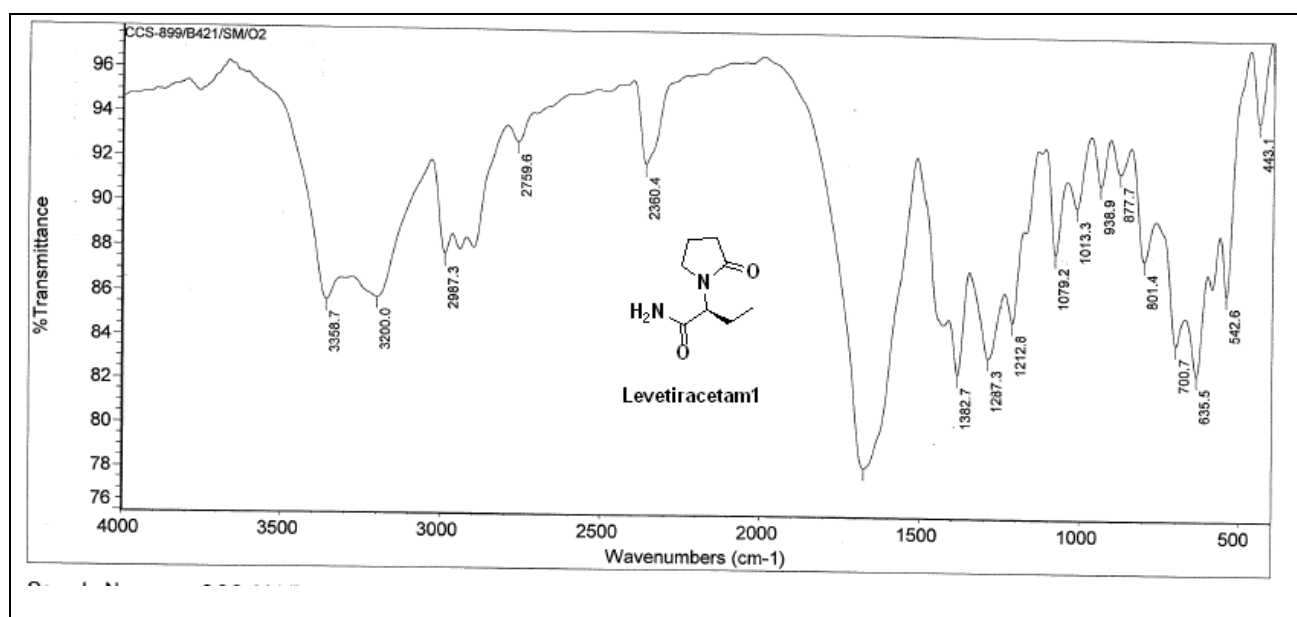

# Chiral HPLC Chromatogram for Levetiracetam,1 :

Blank chromatogram:

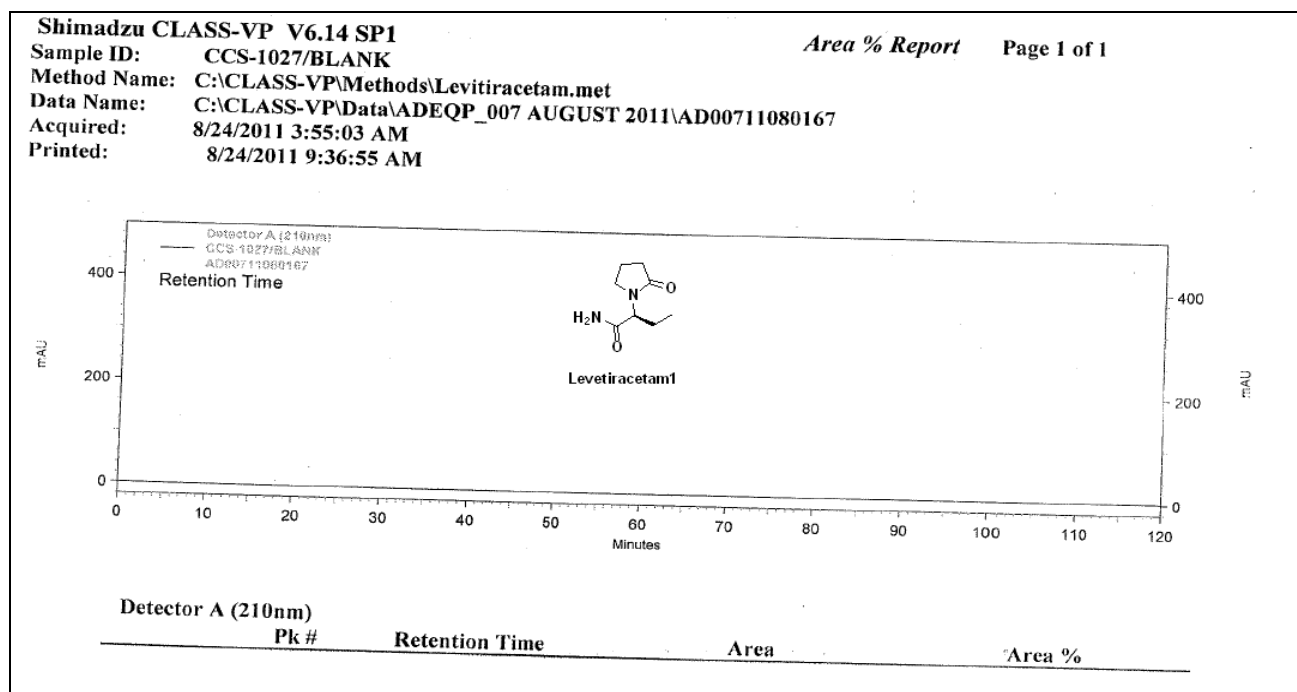

Chiral compound chromatogram:

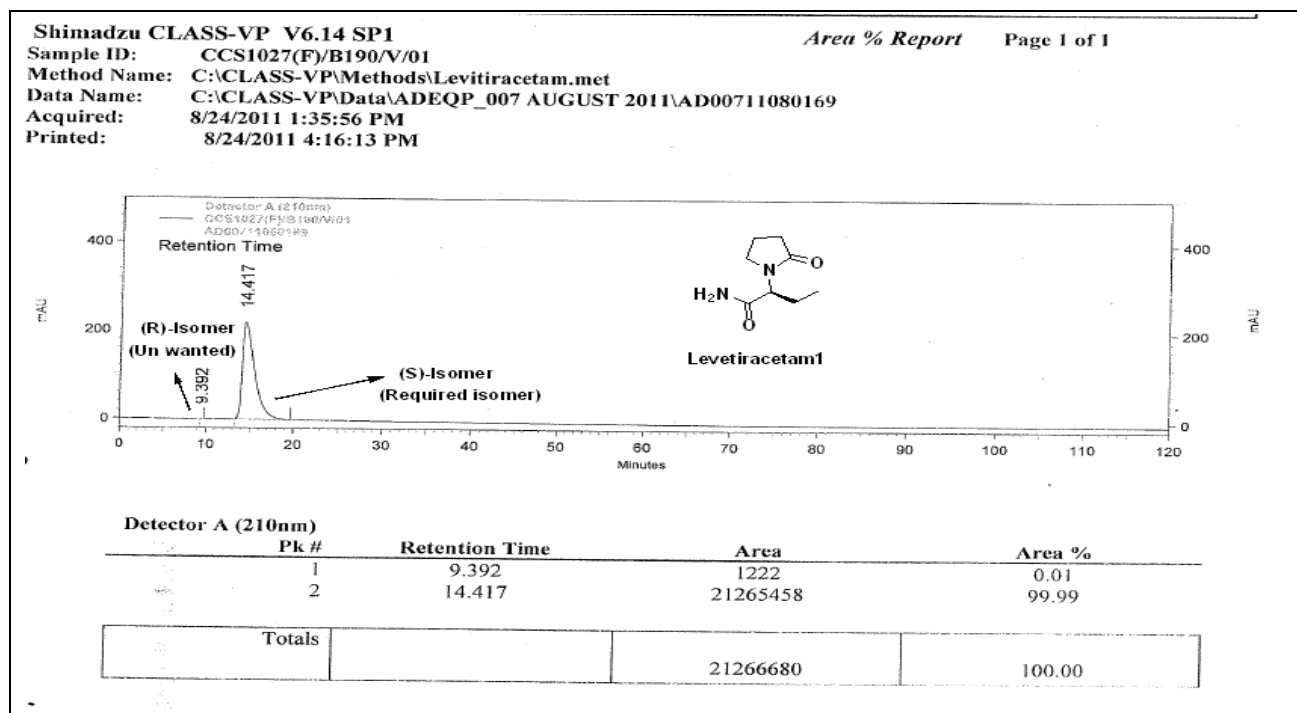

Supplement: f1 [file 176512.f1.pdf]
